# Supplementary material
Source: MDPI journal article supplement (https://www.mdpi.com/1999-4907/13/2/258)
Supplement: s1 [file s1]

## Article

# Identification of Olfactory Genes in *Monochamus saltuarius* and Effects of *Bursaphelenchus xylophilus* Infestation on Their Expression

Sufang Zhang <sup>1,\*</sup>, Xizhuo Wang <sup>1,†</sup>, Yanlong Zhang <sup>1,†</sup>, Yanan Zheng <sup>2</sup>, Zhizhi Fan <sup>1</sup> and Rong Zhang <sup>1</sup>

<sup>1</sup> Key Laboratory of Forest Protection of National Forestry and Grassland Administration, Research Institute of Forest Ecology, Environment and Nature Conservation, Chinese Academy of Forestry, Beijing 100091, China; wavingsnow@126.com (X.W.); zhangyl@caf.ac.cn (Y.Z.); 18234494745@163.com (Z.F.); 13625650836@163.com (R.Z.)

<sup>2</sup> College of Forestry, Shenyang Agricultural University, Shenyang 110866, China rockya@163.com (Y.Z.);

\* Correspondence: zhangsf@caf.ac.cn

† These authors contributed equally to this work.

**Supplementary Materials:** The following supporting information can be downloaded at: [www.mdpi.com/xxx/s1](http://www.mdpi.com/xxx/s1). Figure S1. Sequence length distribution of the *Monochamus saltuarius* antennal transcriptomes assembly. Figure S2. Maximum likelihood dendrogram based on protein sequences of candidate odorant binding protein (OBP) in *M. saltuarius* and orthologs from other insects. IQ-tree best fit model (VT+R6) was used and bootstrap consensus tree inferred from 1000 replicates. *Monochamus saltuarius* (Msal) (red), *S. bifasciatus* (Sbif), *T. castaneum* (Tcas), *A. corpulenta* (Acor), *A. planipennis* (Apla), *D. ponderosae* (Dpon), *Drosophila melanogaster* (Dmel), and *Bombyx mori* (Bmor). Orco clade was marked with green background. Table S1. Candidate chemosensory genes of *Monochamus saltuarius*. Table S2. FPKM and p values of the differently expressed chemosensory genes of *Monochamus saltuarius*.

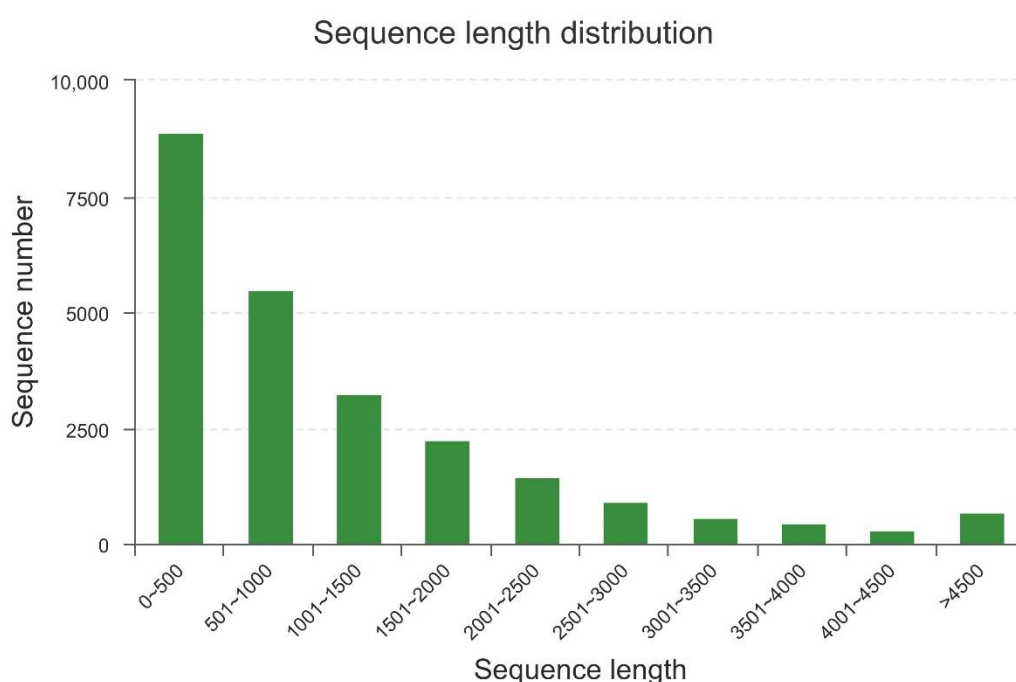

Figure S1. Sequence length distribution of the *Monochamus saltuarius* antennal transcriptomes assembly.

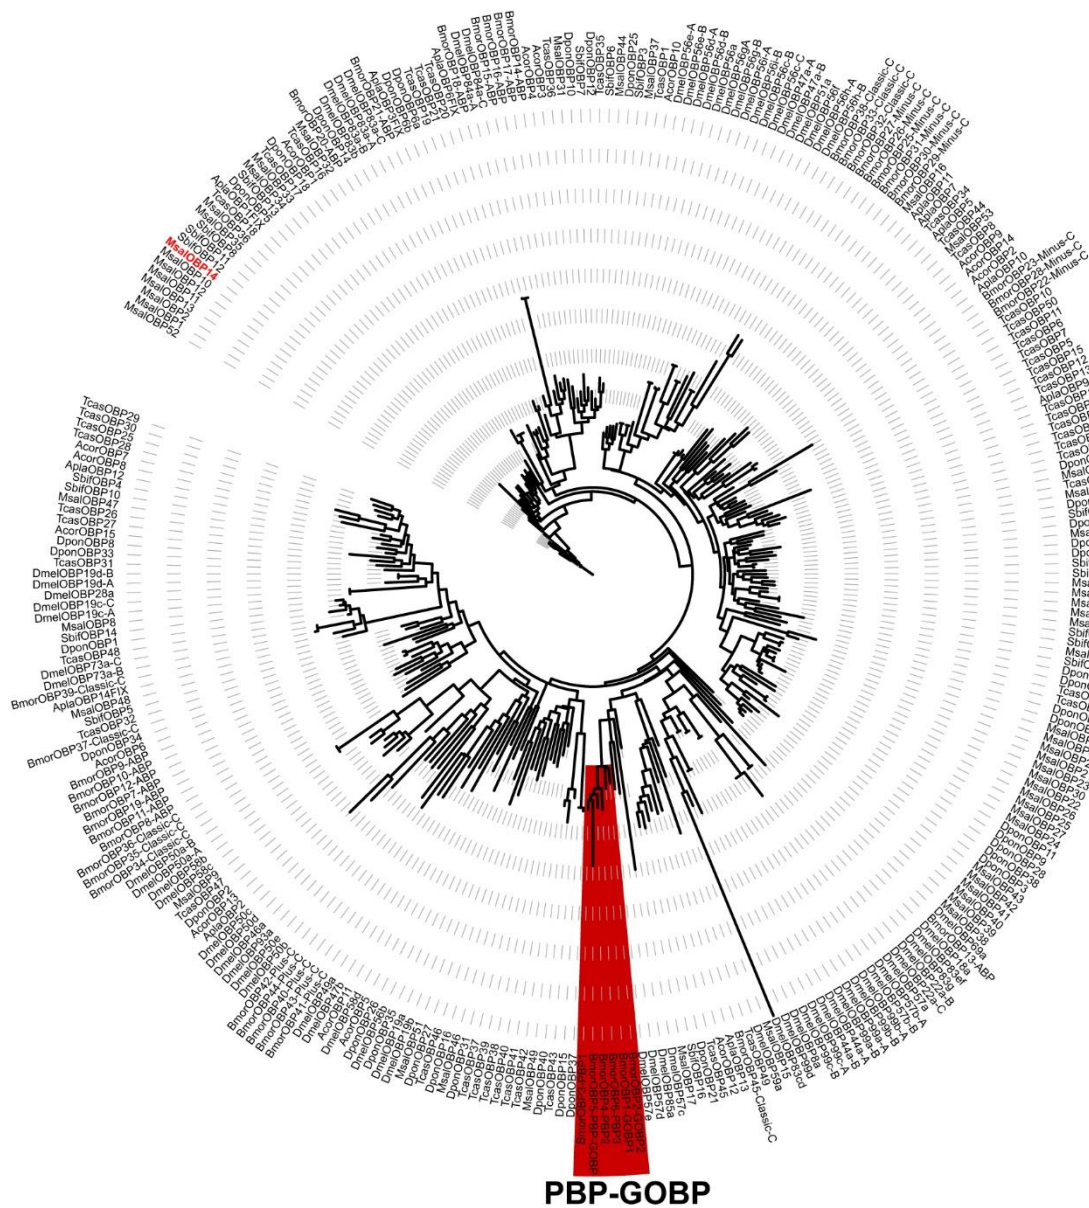

Figure S2. Maximum likelihood dendrogram based on protein sequences of candidate odorant binding protein (OBP) in *M. saltuarius* and orthologs from other insects. IQ-tree best fit model (VT+R6) was used and bootstrap consensus tree inferred from 1000 replicates. *Monochamus saltuarius* (Msal) (red), *S. bifasciatus* (Sbif), *T. castaneum* (Tcas), *A. corpulenta* (Acor), *A. planipennis* (Apla), *D. ponderosae* (Dpon), *Drosophila melanogaster* (Dmel), and *Bombyx mori* (Bmor). Orco clade was marked with green background.

Table S1. Candidate chemosensory genes of *Monochamus saltuarius*.

| Genes name | Unigene ID            |
|------------|-----------------------|
| OBP1       | TRINITY_DN48747_c3_g1 |
| OBP2       | TRINITY_DN49739_c1_g4 |
| OBP3       | TRINITY_DN52500_c0_g2 |
| OBP4       | TRINITY_DN61614_c5_g2 |
| OBP5       | TRINITY_DN45697_c3_g3 |

---

|       |                        |
|-------|------------------------|
| OBP6  | TRINITY_DN41613_c0_g1  |
| OBP7  | TRINITY_DN43550_c0_g1  |
| OBP8  | TRINITY_DN45684_c1_g2  |
| OBP9  | TRINITY_DN43066_c0_g1  |
| OBP10 | TRINITY_DN49419_c1_g3  |
| OBP11 | TRINITY_DN49419_c1_g1  |
| OBP12 | TRINITY_DN50096_c0_g2  |
| OBP13 | TRINITY_DN50932_c2_g4  |
| OBP14 | TRINITY_DN48747_c2_g1  |
| OBP15 | TRINITY_DN55030_c2_g2  |
| OBP16 | TRINITY_DN55885_c2_g5  |
| OBP17 | TRINITY_DN44831_c0_g1  |
| OBP18 | TRINITY_DN43997_c4_g2  |
| OBP19 | TRINITY_DN43627_c0_g2  |
| OBP20 | TRINITY_DN40316_c0_g1  |
| OBP21 | TRINITY_DN57591_c3_g1  |
| OBP22 | TRINITY_DN59092_c4_g1  |
| OBP23 | TRINITY_DN48897_c0_g2  |
| OBP24 | TRINITY_DN55241_c0_g2  |
| OBP25 | TRINITY_DN44663_c1_g1  |
| OBP26 | TRINITY_DN49365_c4_g2  |
| OBP27 | TRINITY_DN46523_c5_g1  |
| OBP28 | TRINITY_DN60475_c1_g1  |
| OBP29 | TRINITY_DN55241_c0_g4  |
| OBP30 | TRINITY_DN48999_c3_g1  |
| OBP31 | TRINITY_DN43093_c12_g1 |
| OBP32 | TRINITY_DN59954_c3_g7  |
| OBP33 | TRINITY_DN47553_c1_g1  |
| OBP34 | TRINITY_DN47850_c0_g1  |
| OBP35 | TRINITY_DN47802_c3_g9  |
| OBP36 | TRINITY_DN47553_c1_g3  |
| OBP37 | TRINITY_DN48048_c0_g1  |
| OBP38 | TRINITY_DN53939_c0_g2  |
| OBP39 | TRINITY_DN62489_c9_g1  |
| OBP40 | TRINITY_DN59920_c1_g3  |
| OBP41 | TRINITY_DN43551_c0_g1  |
| OBP42 | TRINITY_DN44581_c3_g1  |
| OBP43 | TRINITY_DN47235_c1_g1  |
| OBP44 | TRINITY_DN50036_c2_g2  |
| OBP45 | TRINITY_DN48825_c0_g1  |
| OBP46 | TRINITY_DN58938_c0_g1  |
| OBP47 | TRINITY_DN41839_c0_g1  |
| OBP48 | TRINITY_DN42180_c0_g1  |
| OBP49 | TRINITY_DN33697_c0_g1  |
| OBP50 | TRINITY_DN44513_c2_g2  |
| OBP51 | TRINITY_DN39567_c0_g1  |
| OBP52 | TRINITY_DN44613_c2_g1  |
| OBP53 | TRINITY_DN46824_c0_g1  |
| CSP1  | TRINITY_DN58078_c0_g1  |
| CSP2  | TRINITY_DN58923_c1_g1  |
| CSP3  | TRINITY_DN58224_c3_g1  |
| CSP4  | TRINITY_DN59411_c0_g3  |
| CSP5  | TRINITY_DN50377_c3_g1  |
| CSP6  | TRINITY_DN59050_c0_g1  |
| CSP7  | TRINITY_DN44520_c1_g4  |
| CSP8  | TRINITY_DN40952_c0_g1  |

---

|       |                        |
|-------|------------------------|
| CSP9  | TRINITY_DN56532_c2_g1  |
| CSP10 | TRINITY_DN58634_c0_g2  |
| CSP11 | TRINITY_DN57178_c1_g6  |
| CSP12 | TRINITY_DN43945_c0_g1  |
| CSP13 | TRINITY_DN57727_c1_g2  |
| CSP14 | TRINITY_DN49747_c2_g2  |
| CSP15 | TRINITY_DN58634_c0_g1  |
| OR1   | TRINITY_DN51581_c0_g1  |
| OR3   | TRINITY_DN52835_c2_g1  |
| OR4   | TRINITY_DN54385_c7_g3  |
| OR5   | TRINITY_DN42219_c0_g1  |
| OR6   | TRINITY_DN58133_c0_g2  |
| OR7   | TRINITY_DN50342_c3_g1  |
| OR8   | TRINITY_DN52947_c0_g2  |
| OR9   | TRINITY_DN54903_c0_g1  |
| OR10  | TRINITY_DN46689_c0_g1  |
| OR11  | TRINITY_DN40705_c0_g1  |
| OR12  | TRINITY_DN42199_c0_g1  |
| OR13  | TRINITY_DN46388_c0_g1  |
| OR14  | TRINITY_DN41610_c0_g1  |
| OR15  | TRINITY_DN52947_c0_g1  |
| OR16  | TRINITY_DN53088_c0_g2  |
| GR1   | TRINITY_DN62281_c11_g1 |
| GR2   | TRINITY_DN48597_c0_g1  |
| GR3   | TRINITY_DN47419_c0_g1  |
| GR4   | TRINITY_DN54232_c1_g3  |
| GR5   | TRINITY_DN46994_c1_g2  |
| GR6   | TRINITY_DN41833_c0_g1  |
| GR7   | TRINITY_DN54232_c1_g4  |
| GR8   | TRINITY_DN46777_c0_g1  |
| GR9   | TRINITY_DN40790_c0_g1  |
| GR10  | TRINITY_DN61817_c1_g2  |
| IR25  | TRINITY_DN61303_c0_g1  |
| IR2   | TRINITY_DN46820_c0_g1  |
| IR3   | TRINITY_DN60898_c1_g1  |
| IR4   | TRINITY_DN55972_c0_g1  |
| IR5   | TRINITY_DN50525_c0_g2  |
| IR6   | TRINITY_DN60136_c0_g1  |
| IR7   | TRINITY_DN50225_c2_g1  |
| IR8   | TRINITY_DN50500_c0_g3  |
| IR9   | TRINITY_DN54219_c1_g2  |
| IR10  | TRINITY_DN60490_c3_g3  |
| IR11  | TRINITY_DN50500_c0_g2  |
| IR12  | TRINITY_DN54219_c1_g4  |
| IR13  | TRINITY_DN54219_c1_g6  |
| IR93a | TRINITY_DN51666_c1_g1  |
| IR14  | TRINITY_DN45640_c4_g1  |
| IR15  | TRINITY_DN50741_c0_g1  |
| IR16  | TRINITY_DN50500_c0_g1  |
| IR17  | TRINITY_DN60136_c0_g2  |
| IR18  | TRINITY_DN45640_c4_g3  |
| IR19  | TRINITY_DN61303_c0_g2  |
| IR20  | TRINITY_DN56579_c3_g1  |
| IR21  | TRINITY_DN60490_c3_g1  |
| SNMP1 | TRINITY_DN57728_c0_g3  |
| SNMP2 | TRINITY_DN50560_c1_g1  |

---

Table S2. FPKM and p values of the differently expressed chemosensory genes of *Monochamus saltuarius*.

| Differently Expressed OBP    | OBP28     | OBP52     | OBP38    | OBP39    | OBP32    | OBP18    | OBP19    | OBP31    | OBP43    | OBP3     | OBP6    | OBP7     | OBP40    | OBP51    | OBP14     |
|------------------------------|-----------|-----------|----------|----------|----------|----------|----------|----------|----------|----------|---------|----------|----------|----------|-----------|
| Healthy-Female FPKM average  | 11786.62  | 10185.16  | 3885.51  | 2453.46  | 562.04   | 519.47   | 474.56   | 354.52   | 347.56   | 289.61   | 180.58  | 154.23   | 135.02   | 47.69    | 3.64      |
| Healthy-Male FPKM average    | 3156.83   | 4891.67   | 364.67   | 510.32   | 122.31   | 135.55   | 193.56   | 87.20    | 35.59    | 78.18    | 45.30   | 1.33     | 15.69    | 22.48    | 16618.65  |
| p-Value                      | 0.0404166 | 0.0444066 | 0.013818 | 0.011315 | 0.013745 | 0.014822 | 0.049138 | 0.034186 | 0.000706 | 0.009068 | 0.04527 | 0.023058 | 8.06E-05 | 0.020855 | 4.313E-06 |
| Healthy-Female FPKM average  |           |           |          |          |          |          |          |          |          |          |         |          |          |          |           |
| Infested-Female FPKM average |           |           |          |          |          |          |          |          |          |          |         |          |          |          |           |
| p-Value                      |           |           |          |          |          |          |          |          |          |          |         |          |          |          |           |
|                              | OBP14     | OBP30     | OBP52    | OBP44    | OBP35    |          |          |          |          |          |         |          |          |          |           |
| Healthy-Male FPKM average    | 16618.65  | 5430.36   | 4891.67  | 830.90   | 613.1867 |          |          |          |          |          |         |          |          |          |           |
| Infested-Male FPKM average   | 9190.94   | 463.08    | 960.025  | 275.07   | 173.86   |          |          |          |          |          |         |          |          |          |           |
| p-Value                      | 0.006371  | 0.046997  | 0.008222 | 0.032536 | 0.015732 |          |          |          |          |          |         |          |          |          |           |
|                              |           |           |          |          |          |          |          |          |          |          |         |          |          |          |           |
|                              |           |           |          |          |          |          |          |          |          |          |         |          |          |          |           |
| Differently Expressed CSP    | CSP1      | CSP5      | CSP13    |          |          |          |          |          |          |          |         |          |          |          |           |
| Healthy-Female FPKM average  | 623.63667 | 34.4      | 3.946667 |          |          |          |          |          |          |          |         |          |          |          |           |

|                                     |               |               |              |  |  |  |  |  |  |  |  |  |  |  |  |
|-------------------------------------|---------------|---------------|--------------|--|--|--|--|--|--|--|--|--|--|--|--|
| Healthy-Male<br>FPKM average        | 154.466<br>67 | 5189.5        | 6.8633<br>33 |  |  |  |  |  |  |  |  |  |  |  |  |
| p-Value                             | 0.04528<br>59 | 0.00168<br>83 | 0.0092<br>83 |  |  |  |  |  |  |  |  |  |  |  |  |
|                                     | <b>CSP13</b>  |               |              |  |  |  |  |  |  |  |  |  |  |  |  |
| Healthy-Female<br>FPKM average      | 18.5633<br>33 |               |              |  |  |  |  |  |  |  |  |  |  |  |  |
| Infested-Female<br>FPKM average     | 9.17333<br>33 |               |              |  |  |  |  |  |  |  |  |  |  |  |  |
| p-Value                             | 0.03585<br>27 |               |              |  |  |  |  |  |  |  |  |  |  |  |  |
|                                     | <b>CSP9</b>   | <b>CSP13</b>  |              |  |  |  |  |  |  |  |  |  |  |  |  |
| Healthy-Male<br>FPKM average        | 306.433<br>33 | 8.56333<br>33 |              |  |  |  |  |  |  |  |  |  |  |  |  |
| Infested-Male<br>FPKM average       | 111.12        | 3.205         |              |  |  |  |  |  |  |  |  |  |  |  |  |
| p-Value                             | 0.01653<br>12 | 0.02601<br>93 |              |  |  |  |  |  |  |  |  |  |  |  |  |
|                                     |               |               |              |  |  |  |  |  |  |  |  |  |  |  |  |
|                                     |               |               |              |  |  |  |  |  |  |  |  |  |  |  |  |
| <b>Differently<br/>Expressed OR</b> |               |               |              |  |  |  |  |  |  |  |  |  |  |  |  |
| Healthy-Female<br>FPKM average      |               |               |              |  |  |  |  |  |  |  |  |  |  |  |  |
| Healthy-Male<br>FPKM average        |               |               |              |  |  |  |  |  |  |  |  |  |  |  |  |
| p-Value                             |               |               |              |  |  |  |  |  |  |  |  |  |  |  |  |
|                                     |               |               |              |  |  |  |  |  |  |  |  |  |  |  |  |

|                                     |               |               |              |              |              |              |  |  |  |  |  |  |  |  |  |
|-------------------------------------|---------------|---------------|--------------|--------------|--------------|--------------|--|--|--|--|--|--|--|--|--|
| Healthy-Female<br>FPKM average      |               |               |              |              |              |              |  |  |  |  |  |  |  |  |  |
| Infested-Female<br>FPKM average     |               |               |              |              |              |              |  |  |  |  |  |  |  |  |  |
| p-Value                             |               |               |              |              |              |              |  |  |  |  |  |  |  |  |  |
|                                     | <b>OR1</b>    | <b>OR5</b>    | <b>OR10</b>  | <b>OR12</b>  | <b>OR14</b>  | <b>OR16</b>  |  |  |  |  |  |  |  |  |  |
| Healthy-Male<br>FPKM average        | 2.26666<br>67 | 1.68          | 0.7166<br>67 | 2.8166<br>67 | 1.17         | 0.8566<br>67 |  |  |  |  |  |  |  |  |  |
| Infested-Male<br>FPKM average       | 0.53          | 0.46          | 0.23         | 0.765        | 0.355        | 0            |  |  |  |  |  |  |  |  |  |
| p-Value                             | 0.01580<br>95 | 0.00614<br>82 | 0.0167<br>41 | 0.0156<br>15 | 0.0016<br>92 | 0.0074<br>17 |  |  |  |  |  |  |  |  |  |
|                                     |               |               |              |              |              |              |  |  |  |  |  |  |  |  |  |
|                                     |               |               |              |              |              |              |  |  |  |  |  |  |  |  |  |
| <b>Differently<br/>Expressed IR</b> | <b>IR10</b>   | <b>IR12</b>   |              |              |              |              |  |  |  |  |  |  |  |  |  |
| Healthy-Female<br>FPKM average      | 11.1333<br>33 | 39.1433<br>33 |              |              |              |              |  |  |  |  |  |  |  |  |  |
| Healthy-Male<br>FPKM average        | 3.08333<br>33 | 5.02333<br>33 |              |              |              |              |  |  |  |  |  |  |  |  |  |
| p-Value                             | 0.03362<br>15 | 0.04985<br>97 |              |              |              |              |  |  |  |  |  |  |  |  |  |
|                                     | <b>IR4</b>    |               |              |              |              |              |  |  |  |  |  |  |  |  |  |
| Healthy-Female<br>FPKM average      | 1.66          |               |              |              |              |              |  |  |  |  |  |  |  |  |  |
| Infested-Female<br>FPKM average     | 2.045         |               |              |              |              |              |  |  |  |  |  |  |  |  |  |

|                                 |             |             |  |  |  |  |  |  |  |  |  |  |  |  |  |
|---------------------------------|-------------|-------------|--|--|--|--|--|--|--|--|--|--|--|--|--|
| p-Value                         | 0.001799    |             |  |  |  |  |  |  |  |  |  |  |  |  |  |
|                                 | <b>IR25</b> | <b>IR21</b> |  |  |  |  |  |  |  |  |  |  |  |  |  |
| Healthy-Male FPKM average       | 9.626667    | 2.243333    |  |  |  |  |  |  |  |  |  |  |  |  |  |
| Infested-Male FPKM average      | 7.713333    | 1.12        |  |  |  |  |  |  |  |  |  |  |  |  |  |
| p-Value                         | 0.0407848   | 0.0016468   |  |  |  |  |  |  |  |  |  |  |  |  |  |
|                                 |             |             |  |  |  |  |  |  |  |  |  |  |  |  |  |
|                                 |             |             |  |  |  |  |  |  |  |  |  |  |  |  |  |
| <b>Differently Expressed GR</b> |             |             |  |  |  |  |  |  |  |  |  |  |  |  |  |
| Healthy-Female FPKM average     |             |             |  |  |  |  |  |  |  |  |  |  |  |  |  |
| Healthy-Male FPKM average       |             |             |  |  |  |  |  |  |  |  |  |  |  |  |  |
| p-Value                         |             |             |  |  |  |  |  |  |  |  |  |  |  |  |  |
|                                 | <b>GR8</b>  |             |  |  |  |  |  |  |  |  |  |  |  |  |  |
| Healthy-Female FPKM average     | 1.663333    |             |  |  |  |  |  |  |  |  |  |  |  |  |  |
| Infested-Female FPKM average    | 5.97        |             |  |  |  |  |  |  |  |  |  |  |  |  |  |
| p-Value                         | 0.0133062   |             |  |  |  |  |  |  |  |  |  |  |  |  |  |
|                                 |             |             |  |  |  |  |  |  |  |  |  |  |  |  |  |
| Healthy-Male FPKM average       |             |             |  |  |  |  |  |  |  |  |  |  |  |  |  |



|                                           |                   |  |  |  |  |  |  |  |  |  |  |  |  |  |  |
|-------------------------------------------|-------------------|--|--|--|--|--|--|--|--|--|--|--|--|--|--|
| Infested-Male<br>FPKM average             |                   |  |  |  |  |  |  |  |  |  |  |  |  |  |  |
| p-Value                                   |                   |  |  |  |  |  |  |  |  |  |  |  |  |  |  |
|                                           |                   |  |  |  |  |  |  |  |  |  |  |  |  |  |  |
| <b>Differently<br/>Expressed<br/>SNMP</b> |                   |  |  |  |  |  |  |  |  |  |  |  |  |  |  |
| Healthy-Female<br>FPKM average            |                   |  |  |  |  |  |  |  |  |  |  |  |  |  |  |
| Healthy-Male<br>FPKM average              |                   |  |  |  |  |  |  |  |  |  |  |  |  |  |  |
| p-Value                                   |                   |  |  |  |  |  |  |  |  |  |  |  |  |  |  |
|                                           |                   |  |  |  |  |  |  |  |  |  |  |  |  |  |  |
| Healthy-Female<br>FPKM average            |                   |  |  |  |  |  |  |  |  |  |  |  |  |  |  |
| Infested-Female<br>FPKM average           |                   |  |  |  |  |  |  |  |  |  |  |  |  |  |  |
| p-Value                                   |                   |  |  |  |  |  |  |  |  |  |  |  |  |  |  |
|                                           | <b>SNMP<br/>2</b> |  |  |  |  |  |  |  |  |  |  |  |  |  |  |
| Healthy-Male<br>FPKM average              | 1.99              |  |  |  |  |  |  |  |  |  |  |  |  |  |  |
| Infested-Male<br>FPKM average             | 0.80              |  |  |  |  |  |  |  |  |  |  |  |  |  |  |
| p-Value                                   | 0.03101<br>79     |  |  |  |  |  |  |  |  |  |  |  |  |  |  |
